# Supplementary material for: Electrolytic Manganese Dioxide Coatings on High Aspect Ratio Micro-Pillar Arrays for 3D Thin Film Lithium Ion Batteries
Source: MDPI journal article supplement (doi:10.3390/nano7060126), 2017-05-27
Supplement: s1 [file s1]

# Supplementary Materials: Electrolytic Manganese Dioxide Coatings on High Aspect Ratio Micro-Pillar Arrays for 3D Thin Film Lithium Ion Batteries

Yafa Zargouni <sup>1,2,3,4,\*</sup>, Stella Deheryan <sup>2,4</sup>, Alex Radisic <sup>2</sup>, Khaled Alouani <sup>3</sup> and Philippe M. Vereecken <sup>2,4</sup>

EDX analysis using NOVA 200 Microscope.

Figure S1a and b show the EDX spectra for the as-deposited  $\gamma$ -MnO<sub>2</sub> film carried out on different points of the sample. The presence of manganese and oxygen peaks confirm that the deposited material on carbon coated TiN/Si pillars is a manganese oxide. The morphology of the tested sample is also illustrated in SEM images on the left of EDX spectra in figure 1.

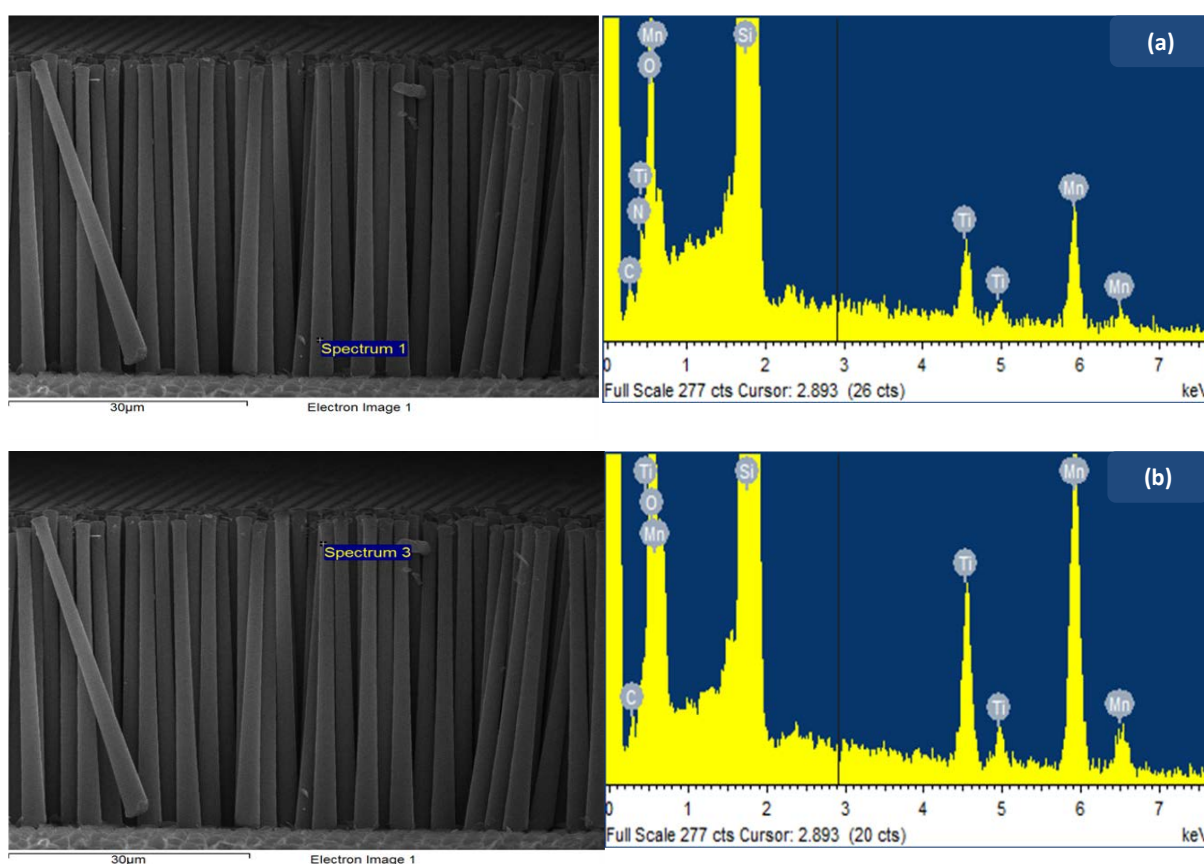

**Figure S1.** EDX spectra of as-deposited  $\gamma$ -MnO<sub>2</sub> on carbon coated TiN/Si pillars.
